# Supplementary material for: High Redox Status as the Basis for Heavy Metal Tolerance of Sesuvium portulacastrum L. Inhabiting Contaminated Soil in Jeddah, Saudi Arabia
Source: MDPI journal article supplement (doi:10.3390/antiox11010019), 2021-12-22
Supplement: s1 [file s1]

Table S1: Monthly variations of rainfall, relative humidity in the study area. The data were extracted from the Jeddah meteorological station (Saudi Arabia).

|           | Temperature °C |      |      | Relative Humidity (%) |    |    | Precipitation (ml) |
|-----------|----------------|------|------|-----------------------|----|----|--------------------|
|           | Mx             | Mn   | M    | Mx                    | Mn | M  |                    |
| January   | 26.8           | 18.2 | 22.3 | 81                    | 8  | 46 | 0                  |
| February  | 28             | 19.6 | 23.6 | 87                    | 14 | 53 | 1                  |
| March     | 30.5           | 20.7 | 25.3 | 95                    | 9  | 55 | 6.2                |
| April     | 32.8           | 23.2 | 27.8 | 83                    | 17 | 53 | 0                  |
| May       | 35.9           | 26.8 | 31.2 | 84                    | 8  | 49 | 0                  |
| June      | 37.9           | 27.3 | 32.3 | 86                    | 5  | 52 | 0                  |
| July      | 38.5           | 29.1 | 33.6 | 93                    | 12 | 49 | 2                  |
| August    | 38.7           | 30   | 34.2 | 81                    | 19 | 52 | 0                  |
| September | 38.7           | 30   | 33.9 | 88                    | 5  | 58 | TRACE              |
| October   | 39.2           | 27   | 32.4 | 89                    | 3  | 49 | 3.8                |
| November  | 33.1           | 25.3 | 28.8 | 88                    | 23 | 57 | 19                 |
| December  | 31.9           | 22.4 | 26.6 | 84                    | 8  | 53 | 8                  |

Table S2: List of the recorded species with their, families, relative densities (RD) and frequencies (F) in the different sites.

| families       | Species                                          | S1  |      | S2  |    | S3  |     | S4  |    | S5   |     |
|----------------|--------------------------------------------------|-----|------|-----|----|-----|-----|-----|----|------|-----|
|                |                                                  | RD  | F    | RD  | F  | RD  | F   | RD  | F  | RD   | F   |
| Aizoaceae      | <i>Blepharis attenuate</i> Napper                | 2.7 | 15.6 | 0   | 0  | 0   | 0   | 0   | 0  | 0    | 0   |
|                | <i>Aizoon canariense</i> L.                      | 1.3 | 8    | 0   | 0  | 0   | 0   | 0   | 0  | 0    | 0   |
| Aizoaceae      | <i>Sesuvium portulacastrum</i> L.                | 0   | 0    | 1.2 | 15 | 7.3 | 65  | 9.5 | 83 | 10.3 | 100 |
|                | <i>Trianthema portulacastrum</i> L.              | 1   | 0    | 6.7 | 25 | 3   | 8.6 | 2   | 13 | 0    | 0   |
| Asclepiadaceae | <i>Calotropis procera</i> (Aiton) W.T.Aiton      | 1.9 | 15   | 1.2 | 3  | 0   | 0   | 0   | 0  | 0    | 0   |
| Boraginaceae   | <i>Heliotropium bacciferum</i> Forssk.           | 0   | 0    | 1   | 5  | 1.2 | 13  | 1   | 11 | 0    | 0   |
|                | <i>Mareua oblongifolia</i> (Frossk.) A.Rich.     | 1.5 | 6    | 0   | 0  | 0   | 0   | 0   | 0  | 0    | 0   |
| Capparaceae    | <i>Diptergium glaucum</i> Decne.                 | 1.3 | 11   | 0   | 0  | 0   | 0   | 0   | 0  | 0    | 0   |
|                | <i>Cadaba glandulosa</i> Frossk.                 | 0   | 0    | 0   | 0  | 0   | 0   | 1.1 | 0  | 0    | 0   |
| Chenopodiaceae | <i>Salsola tetrandra</i> Forssk                  | 0   | 0    | 1   | 7  | 1.1 | 9   | 1   | 9  | 0    | 0   |
|                | <i>Suaeda monica</i> Frossk.ex J.F. Gmel.        | 1.5 | 12   | 1.3 | 21 | 0   | 0   | 0   | 0  | 0    | 0   |
|                | <i>Acacia hamulosa</i> Benth.                    | 4.3 | 27   | 0   | 0  | 0   | 0   | 0   | 0  | 0    | 0   |
| Fabaceae       | <i>Acacia tortilis</i> (Forssk.) Hayne           | 3.2 | 16   | 0   | 0  | 0   | 0   | 0   | 0  | 0    | 0   |
|                | <i>Prosopis Juliflora</i> (Sw.) DC.              | 0   | 0    | 1.5 | 11 | 1.9 | 12  | 2.4 | 85 | 3.5  | 90  |
| Malvaceae      | <i>Abutilon pannosum</i> (G. Forst.) Schltldl.   | 1.1 | 3    | 0   | 0  | 0   | 0   | 0   | 0  | 0    | 0   |
|                | <i>Cynodon dactylon</i> (L.) Pers.               | 1.5 | 7    | 0   | 0  | 0   | 0   | 0   | 0  | 0    | 0   |
|                | <i>Echinochloa colona</i> (L.) Link              | 0   | 0    | 7.4 | 45 | 6.8 | 24  | 8.9 | 50 | 0    | 0   |
| Poaceae        | <i>Leptochloa fusca</i> (L.) Kunth               | 0   | 0    | 0   | 0  | 5.7 | 19  | 1   | 4  | 9.1  | 60  |
|                | <i>Phragmites australis</i> (Cav.) Trin ex Steud | 0   | 0    | 0   | 0  | 2.3 | 14  | 21  | 63 | 11   | 14  |
|                | <i>Stipa capensis</i> Thunb.                     | 1.3 | 12   | 0   | 0  | 0   | 0   | 0   | 0  | 0    | 0   |
| Portulacaceae  | <i>Portulaca oleraceae</i> L.                    | 0   | 0    | 6.2 | 14 | 5.9 | 19  | 0   | 0  | 0    | 0   |
| Solanaceae     | <i>Solanum incanum</i> L.                        | 3.4 | 16   | 0   | 0  | 0   | 0   | 0   | 0  | 0    | 0   |
| Tamaricaceae   | <i>Tamarix nilotica</i> (Ehrenb.) Bunge          | 0   | 0    | 0   | 0  | 2.1 | 13  | 1   | 3  | 1.1  | 12  |
| Zygophyllaceae | <i>Fagonia mollis</i> Delile.                    | 2.7 | 5    | 0   | 0  | 0   | 0   | 0   | 0  | 0    | 0   |

**Table S3:** Redox status of ASC (ASC/TASC, ASC/DHA) and GSH (GSH/TGSH, GSH/GSSG) of *S. portulacastrum* grown in different control site (Site 1) and contaminated sites (Site 2-5). Data are mean values  $\pm$  SE (n=4). Different letters represents the significant differences between the effect of heavy metal stress in the different target sites (Tuckey test ( $P < 0.05$ )).

|          | S1                           |                              | S2                           |                              | S3                           |                              | S4                            |                              | S5                           |                              |
|----------|------------------------------|------------------------------|------------------------------|------------------------------|------------------------------|------------------------------|-------------------------------|------------------------------|------------------------------|------------------------------|
|          | Root                         | Shoot                        | Root                         | Shoot                        | Root                         | Shoot                        | Root                          | Shoot                        | Root                         | Shoot                        |
| ASC/TASC | 67.3 $\pm$ 3.9 <sup>a</sup>  | 54.6 $\pm$ 0.3 <sup>a</sup>  | 53.9 $\pm$ 0.2 <sup>ab</sup> | 41.6 $\pm$ 2.5 <sup>b</sup>  | 43.2 $\pm$ 0.4 <sup>b</sup>  | 30 $\pm$ 1.4 <sup>c</sup>    | 42.3 $\pm$ 9.1 <sup>ab</sup>  | 31 $\pm$ 0.5 <sup>d</sup>    | 33.3 $\pm$ 4.1 <sup>c</sup>  | 27.9 $\pm$ 0.1 <sup>d</sup>  |
| ASCH/DHA | 0.86 $\pm$ 0.04 <sup>a</sup> | 0.91 $\pm$ 0.07 <sup>a</sup> | 0.69 $\pm$ 0.05 <sup>b</sup> | 0.73 $\pm$ 0.1 <sup>b</sup>  | 0.42 $\pm$ 0 <sup>c</sup>    | 0.53 $\pm$ 0.03 <sup>c</sup> | 0.34 $\pm$ 0 <sup>d</sup>     | 0.39 $\pm$ 0.02 <sup>d</sup> | 0.24 $\pm$ 0.09 <sup>e</sup> | 0.32 $\pm$ 0.01 <sup>d</sup> |
| GSH/TGSH | 50.9 $\pm$ 1.9 <sup>a</sup>  | 47.6 $\pm$ 2.9 <sup>a</sup>  | 40.2 $\pm$ 2.1 <sup>ab</sup> | 26.9 $\pm$ 1.6 <sup>b</sup>  | 15.9 $\pm$ 1.3 <sup>c</sup>  | 25.5 $\pm$ 0.4 <sup>b</sup>  | 24.9 $\pm$ 0.3 <sup>b</sup>   | 22 $\pm$ 0.6 <sup>b</sup>    | 17.3 $\pm$ 1.6 <sup>c</sup>  | 13.3 $\pm$ 1.7 <sup>c</sup>  |
| GSH/GSSG | 0.53 $\pm$ 0.07 <sup>a</sup> | 0.44 $\pm$ 0.07 <sup>a</sup> | 0.25 $\pm$ 0.04 <sup>b</sup> | 0.34 $\pm$ 0.09 <sup>b</sup> | 0.21 $\pm$ 0.01 <sup>b</sup> | 0.34 $\pm$ 0.07 <sup>b</sup> | 0.262 $\pm$ 0.06 <sup>b</sup> | 0.36 $\pm$ 0.02 <sup>b</sup> | 0.162 $\pm$ 0.1 <sup>c</sup> | 0.18 $\pm$ 0.05 <sup>c</sup> |
